# Supplementary material for: On-surface light-induced generation of higher acenes and elucidation of their open-shell character
Source: PubMed Central journal article supplement (PMC6382834; doi:10.1038/s41467-019-08650-y), 2019-02-20
Supplement: 41467_2019_8650_MOESM2_ESM.pdf [file 41467_2019_8650_MOESM2_ESM.pdf]

## **Description of Additional Supplementary Files**

File Name: Supplementary Movie 1

Description: Nonacene precursor light-illumination in solution
